# Supplementary material for: Quantitative Genetics Identifies Cryptic Genetic Variation Involved in the Paternal Regulation of Seed Development
Source: PubMed Central journal article supplement (PMC4727937; doi:10.1371/journal.pgen.1005806), 2016-01-26

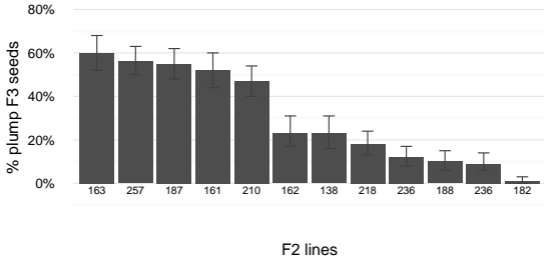

Supplement: pgen.1005806.s002.pdf [file pgen.1005806.s002.pdf]
